# Supplementary material
Source: PubMed Central journal article supplement (PMC6003597)
Supplement: NIHMS76520-supplement-Supplemental_Material.pdf [file NIHMS76520-supplement-Supplemental_Material.pdf]

601 **Supporting Information**

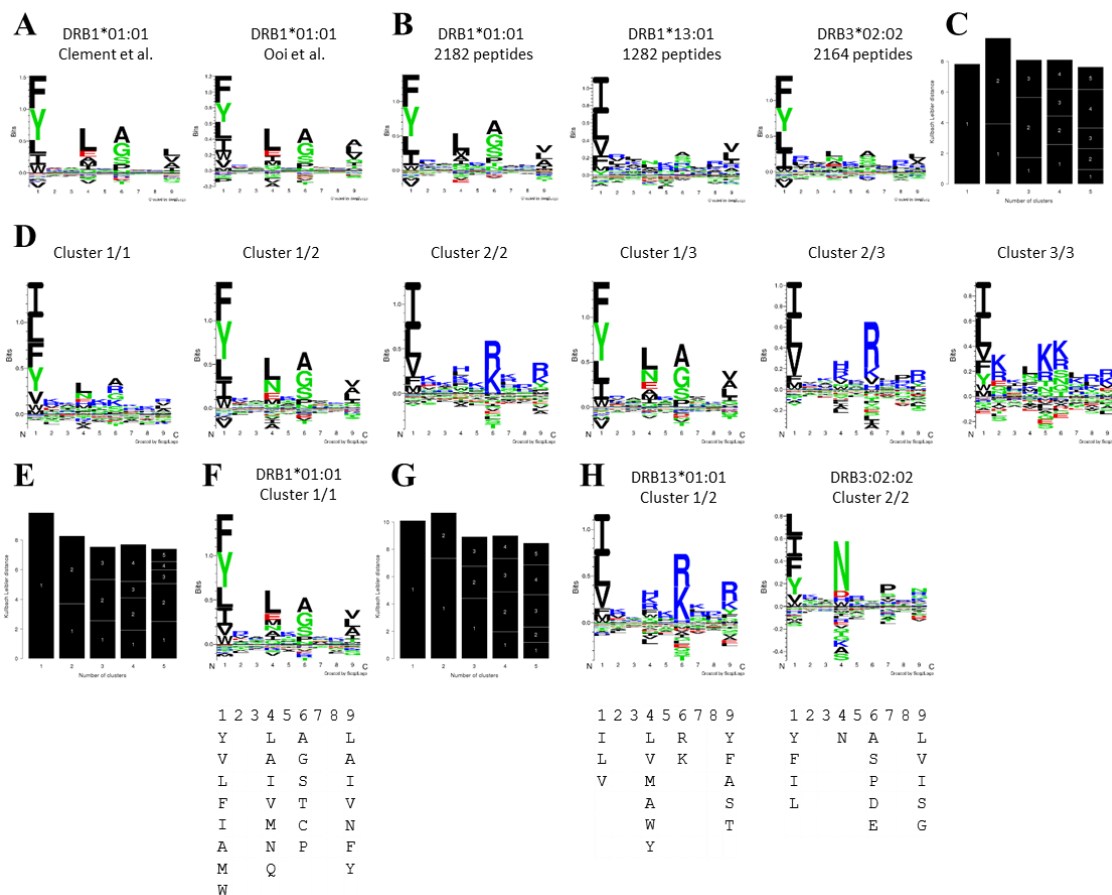

602

603 **Supporting Information Figure 1: Assignment of peptides identified from Maver-1 cells to**  
 604 **respective HLA class II alleles. (A)** Definition of the DRB1\*01:01 motif from the literature.  
 605 Peptide sequences identified from DRB1\*01:01 homozygous cell lines reported by Clement et al.  
 606 and Ooi et al. were subjected to Gibbs Cluster-2.0 analysis. Left panel: Sequence logo for the  
 607 peptide sequences reported by Clement et al. [Clement, C. C., et al. JBC 2016, 291, 11, 5576-5595].  
 608 Right panel: Sequence logo for the peptide sequences reported by Ooi et al. [Ooi, J. D., et al. Nature  
 609 2017, 545, 243-250]. **(B)** NetMHCIIpan 3.1 analysis of peptide sequences identified from Maver-  
 610 1 cells. All peptide sequences from Maver-1 cells were submitted to NetMHCIIpan 3.1. HLA-  
 611 specific motifs were plotted from core sequences of peptides with %Rank below 10. **(C-D)** Gibbs  
 612 Cluster-2.0 analysis of the HLA DR peptide sequences identified from Maver-1 cells. **(C)**

613 Information content of the results between one and five clusters per solution. The solution with two  
614 clusters (i.e. with the largest Kullbach Leibler distance) was proposed as the optimal result. **(D)**  
615 Sequence logos reported by Gibbs Cluster-2.0 for the solutions (from left to right) with one, two,  
616 and three clusters, respectively. **(E-F)** To identify DRB3\*02:02-eluted peptides, all Maver-1  
617 peptide sequences were scored against the PSSM of the DRB1\*01:01-specific motif from **(A)** with  
618 the scoring function described in the Materials and Methods section. A score greater than 3.3 was  
619 found to predict binding to DRB1\*01:01, as defined by comparing scores obtained from true  
620 positive and true negative data via ROC analysis. **(E-F)** Gibbs Cluster-2.0 analysis of peptide  
621 sequences predicted to bind to DRB1\*01:01. **(E)** Information content of the results between one  
622 and five clusters per solution. The solution with one cluster was proposed as the optimal result. **(F)**  
623 Sequence logo reported for DRB1\*01:01 (upper panel) and respective SYFPEITHI motif (lower  
624 panel). **(G-H)** Gibbs Cluster-2.0 analysis of peptide sequences not predicted to bind to  
625 DRB1\*01:01. **(G)** Information content of the results between one and five groups per solution. The  
626 solution with two clusters was proposed as the optimal result. **(H)** Sequence logos (upper panels)  
627 reported for the two clusters and comparison with the SYFPEITHI motifs (lower panels) of  
628 DRB1\*13:01 (left panels) and DRB3\*02:02 (right panels), respectively.  
629

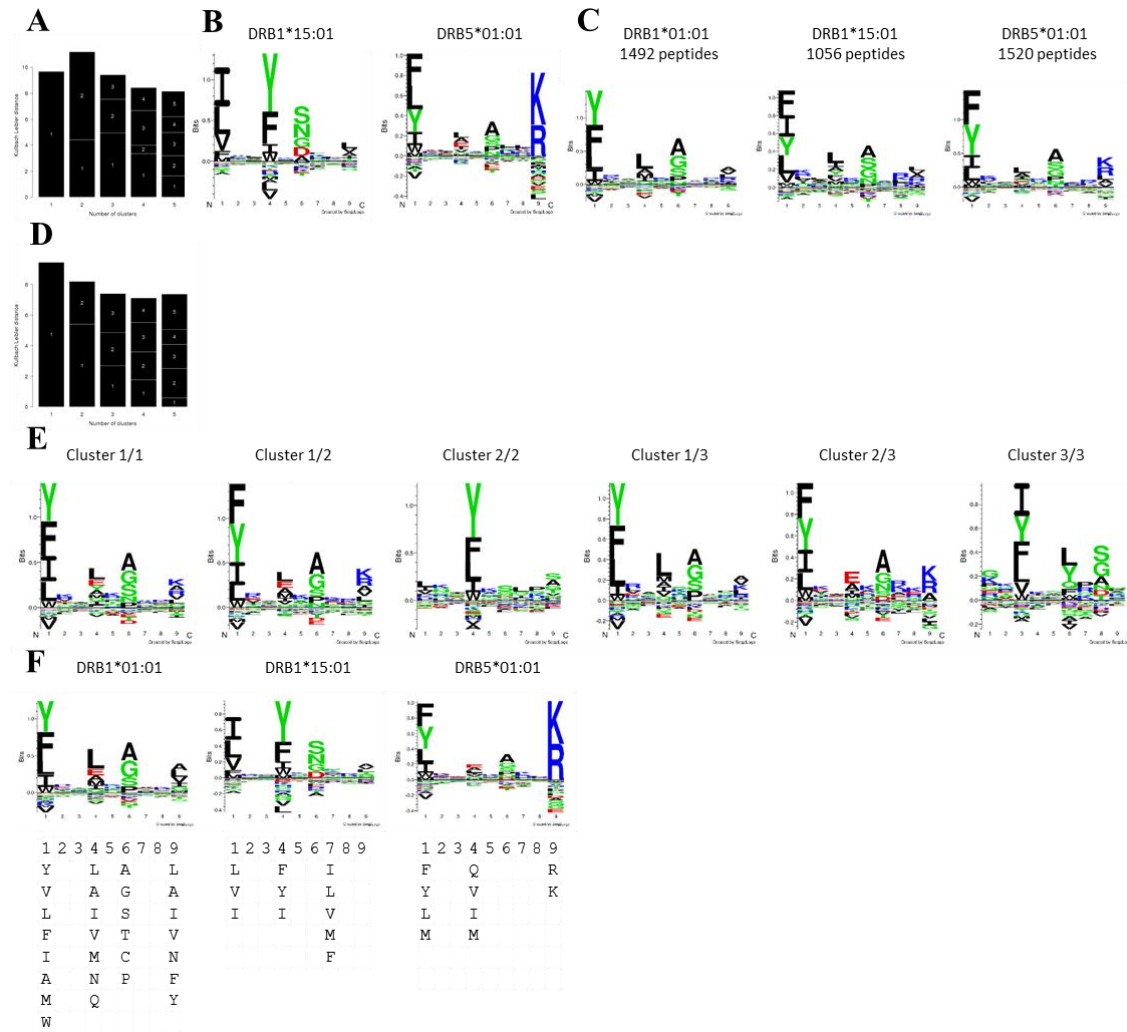

630

631 **Supporting Information Figure 2: Assignment of peptides identified from DOHH2 cells to**  
 632 **respective HLA class II alleles. (A-B)** Definition of the DRB1\*15:01 and DRB5\*01:01 motifs  
 633 from the literature. Peptide sequences reported by Ooi et al. [Ooi, J. D., et al. Nature 2017, 545,  
 634 243-250] eluted from a cell line positive for DRB1\*15:01 and DRB5\*01:01 were subjected to  
 635 Gibbs Cluster-2.0 analysis. **(A)** Information content of the results between one and five clusters per  
 636 solution. The solution with two cluster (i.e. with the largest Kullback Leibler distance) was  
 637 proposed as the optimal result. **(B)** DRB1\*15:01 and DRB5\*01:01-specific motifs. According to  
 638 motifs reported by SYFPEITHI, clusters reported by Gibbs Cluster-2.0 could be annotated  
 639 unambiguously to DRB1\*15:01 (left panel) and DRB5\*01:01 (right panel). **(C)** NetMHCIIpan 3.1

640 analysis of peptide sequences identified from DOHH2 cells. All peptide sequences from DOHH2  
641 cells were submitted to NetMHCIIpan 3.1. HLA-specific motifs were plotted from core sequences  
642 of peptides with %Rank below 10. **(D-E)** Gibbs Cluster-2.0 analysis of the HLA DR peptide  
643 sequences identified from DOHH2 cells. **(D)** Information content of the results between one and  
644 five clusters per solution. The solution with one cluster (i.e. with the largest Kullbach Leibler  
645 distance) was proposed as the optimal result. **(E)** Sequence logos reported by Gibbs Cluster-2.0 for  
646 the solutions (from left to right) with one, two, and three clusters, respectively. **(F)** DOHH2 specific  
647 motifs as determined through scoring of the DOHH2 peptide sequences against the PSSMs from  
648 **(A)** and **Supporting Information Figure 1A**. Each peptide was assigned to the allele for which  
649 the highest score was obtained from the scoring procedure outlined in Material and Methods.  
650 Finally, core sequences (i.e. the 9mer sequence with the highest score) were submitted to  
651 Seq2Logo-2.0 to obtain respective sequence logos.

652
